# Supplementary material
Source: publisher site journal article supplement (https://cdn.jamanetwork.com/ama/content_public/journal/neur/929672/noi130066supp1_prod.pdf)
Supplement: Supplementary file 1 [file noi130066supp1_prod.pdf]

## Supplementary Online Content

Alcalay RN, Caccappolo E, Mejia-Santana H, et al. Cognitive and motor function in long-duration *PARKIN*-associated Parkinson disease [published online November 4, 2013]. *JAMA Neurol*. doi:10.1001/jamaneurol.2013.4498.

**eTable 1.** Neuropsychological tests and cognitive domains

**eTable 2.** Performance of *PARKIN* compound heterozygotes/homozygotes carriers and noncarriers on individual neuropsychological tests (group means and SDs)

This supplementary material has been provided by the authors to give readers additional information about their work.

**eTable 1. Neuropsychological tests and cognitive domains**

| <b>Domain</b>                | <b>Tests</b>                                                                                                                                                                                        |
|------------------------------|-----------------------------------------------------------------------------------------------------------------------------------------------------------------------------------------------------|
| <b>Psychomotor speed</b>     | Trail Making Test, Part A (TMT-A)<br>Stroop Color Word Test, Part A (word reading) and Part B (color naming) trials                                                                                 |
| <b>Attention</b>             | Trail Making Test, Part B (TMT-B)<br>Stroop Color Word Test, Part C (color word trial)                                                                                                              |
| <b>Memory</b>                | California Verbal Learning Test-II (CVLT-II)<br>Wechsler Memory Scale-R Visual Reproduction subtest (WMS-R Visual Reproduction)<br>Benton Visual Retention Test-Revised Delayed Recall trial (BVRT) |
| <b>Visuospatial function</b> | Benton Visual Retention Test-Revised, Matching Trial (BVRT)<br>Benton Facial Recognition Test (BFRT)                                                                                                |
| <b>Executive function</b>    | Controlled Oral Word Association Test (COWAT)<br>Category fluency<br>CVLT-II Recognition Errors (False Positives)                                                                                   |

**eTable 2. Performance of *PARKIN* compound heterozygotes/homozygotes carriers and noncarriers on individual neuropsychological tests (group means and SDs)**

| Test                                                               | <i>PARKIN</i> compound heterozygotes/homozygotes (n=21) | Noncarriers (n=23)     | P value |
|--------------------------------------------------------------------|---------------------------------------------------------|------------------------|---------|
| <b>Psychomotor Speed</b>                                           |                                                         |                        |         |
| Trail Making Test, Part A raw score (sec)*<br><i>Range</i>         | 47.5 (42.8)<br>20-205                                   | 65.5 (46.6)<br>27-240  | 0.199   |
| Stroop Test Word Reading raw score<br><i>Range</i>                 | 79.1 (14.6)<br>49-102                                   | 75.5 (20.6)<br>35-126  | 0.531   |
| Stroop Test Color Naming raw score<br><i>Range</i>                 | 59.4 (10.1)<br>40-80                                    | 48.9 (14.5)<br>13-69   | 0.010   |
| <b>Attention</b>                                                   |                                                         |                        |         |
| Trail Making Test, Part B raw score (sec)*<br><i>Range</i>         | 104.9 (64.7)<br>30-240                                  | 151.6 (69.2)<br>55-295 | 0.034   |
| Stroop Color Word Raw score<br><i>Range</i>                        | 32.7 (9.0)<br>15-46                                     | 26.7 (10.6)<br>10-48   | 0.055   |
| <b>Memory</b>                                                      |                                                         |                        |         |
| CVLT Total Recall (trials 1-5) raw score<br><i>Range</i>           | 40.4 (7.6)<br>27-51                                     | 34.5 (10.4)<br>17-56   | 0.041   |
| CVLT Long Delayed Free Recall raw score<br><i>Range</i>            | 9.0 (3.1)<br>4-14                                       | 5.8 (3.8)<br>0-11      | 0.004   |
| CVLT Delayed Recognition Total Hits raw score<br><i>Range</i>      | 13.1 (2.8)<br>7-16                                      | 13.6 (1.9)<br>8-16     | 0.540   |
| WMS-R Visual Repro I raw score<br><i>Range</i>                     | 25.4 (8.7)<br>9-38                                      | 24.1 (10.6)<br>0-35    | 0.653   |
| WMS-R Visual Repro II raw score<br><i>Range</i>                    | 19.8 (11.2)<br>0-36                                     | 19.8 (10.6)<br>0-34    | 0.991   |
| BVRT Recognition subtest raw score<br><i>Range</i>                 | 8.8 (1.5)<br>5-10                                       | 7.3 (2.2)<br>2-10      | 0.012   |
| <b>Visuospatial Function</b>                                       |                                                         |                        |         |
| BVRT Matching subtest raw score<br><i>Range</i>                    | 9.7 (0.7)<br>8-10                                       | 9.0 (1.7)<br>4-10      | 0.068   |
| Facial Recognition Total raw score<br><i>Range</i>                 | 22.1 (2.2)<br>18-26                                     | 21.2 (5.3)<br>12-39    | 0.487   |
| <b>Executive Function</b>                                          |                                                         |                        |         |
| COWAT Total raw score<br><i>Range</i>                              | 38.8 (11.5)<br>15-57                                    | 30.3 (16.1)<br>5-63    | 0.054   |
| Category Fluency Total raw score<br><i>range</i>                   | 18.3(5.4)<br>5-28                                       | 13.9 (6.2)<br>2-24     | 0.018   |
| CVLT Delayed Recognition False Positives raw score<br><i>Range</i> | 4.6(4.1)<br>0-17                                        | 4.7 (3.8)<br>0-13      | 0.928   |

\* low scores reflect higher performance
